# Supplementary material for: ATP-binding and hydrolysis of human NLRP3
Source: PubMed Central journal article supplement (PMC9633759; doi:10.1038/s42003-022-04120-2), 2022-11-03
Supplement: 42003_2022_4120_MOESM2_ESM.pdf [file 42003_2022_4120_MOESM2_ESM.pdf]

## Description of Additional Supplementary Files

**File name:** Supplementary Data 1

**Description:** Source data to Figures 1c, 1d, 2a, 2b, 2c, 2d, 3b, 3c, 4a, 4b, 4c, 4d, 5a, 5b, 5c, 5d, 6a, and 6b in an Excel file.
